# Supplementary material
Source: PubMed Central journal article supplement (PMC3626567)
Supplement: NIHMS454991-supplement-01.pdf [file NIHMS454991-supplement-01.pdf]

**Cell Metabolism, Volume 17**

**Supplemental Information**

**Adipose Subtype-Selective Recruitment**

**of TLE3 or Prdm16 by PPAR $\gamma$  Specifies Lipid Storage**

**versus Thermogenic Gene Programs**

Claudio J. Villanueva, Laurent Vergnes, Jiexin Wang, Brian G. Drew, Cynthia Hong, Yiping Tu, Yan Hu, Xu Peng, Feng Xu, Enrique Saez, Kevin Wroblewski, Andrea L. Hevener, Karen Reue, Loren G. Fong, Stephen G. Young, and Peter Tontonoz

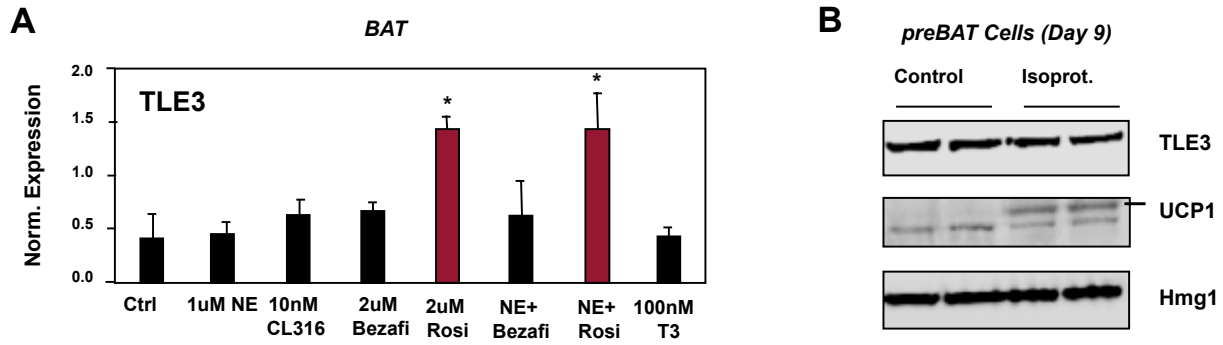

**Figure S1. Induction of TLE3 Expression in Brown Preadipocytes by PPAR $\gamma$  Agonists, Related to Figure 1**

A. Real-time PCR analysis of TLE3 expression in immortalized primary brown preadipocytes treated with various stimuli. B. Immunoblot analysis of TLE3 protein expression in differentiated brown preadipocytes treated on Day 9 of differentiation with vehicle or 5  $\mu$ M isoproterenol as indicated.

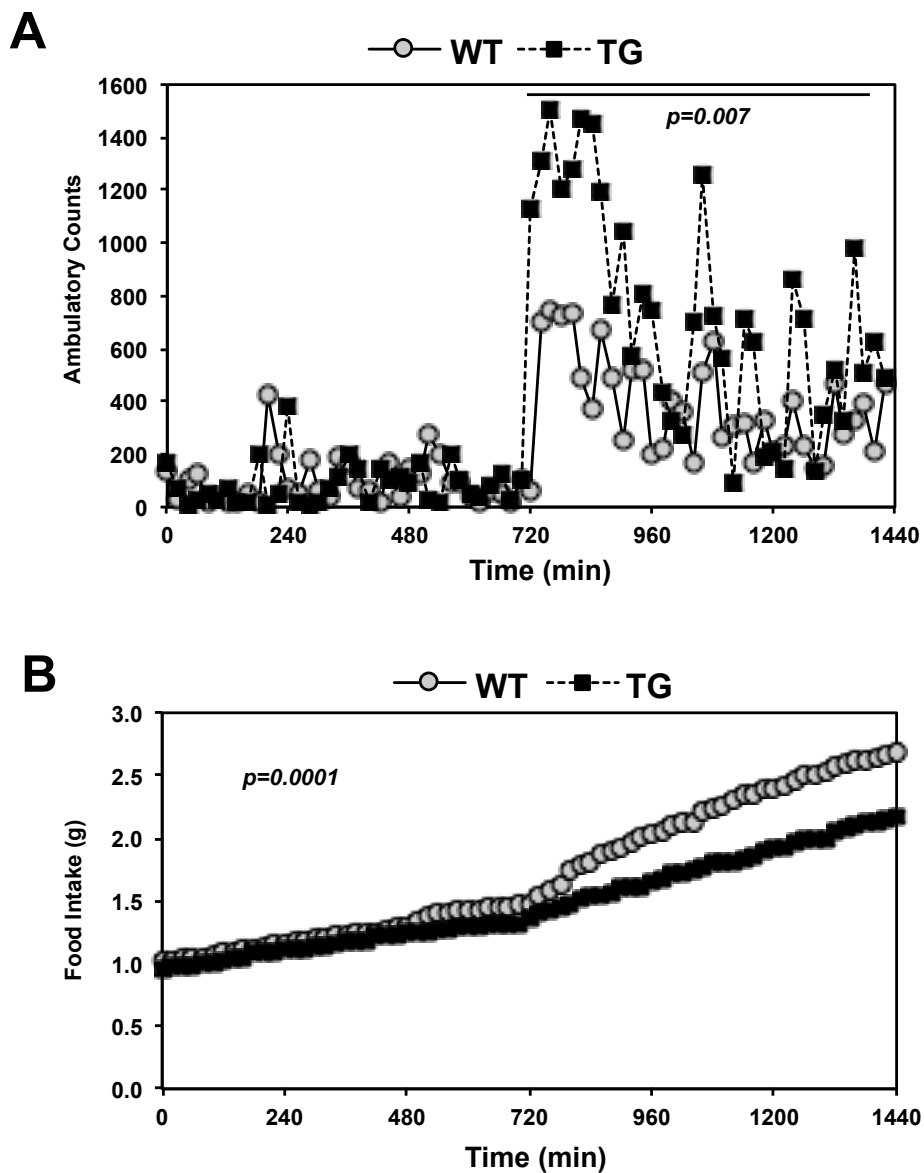

**Figure S2. Related to Figure 2**

Physical activity (A) and food intake (B) in aP2-TLE3 Tg and littermate control mice (N=5) determined by housing in Oxymax metabolic cages.

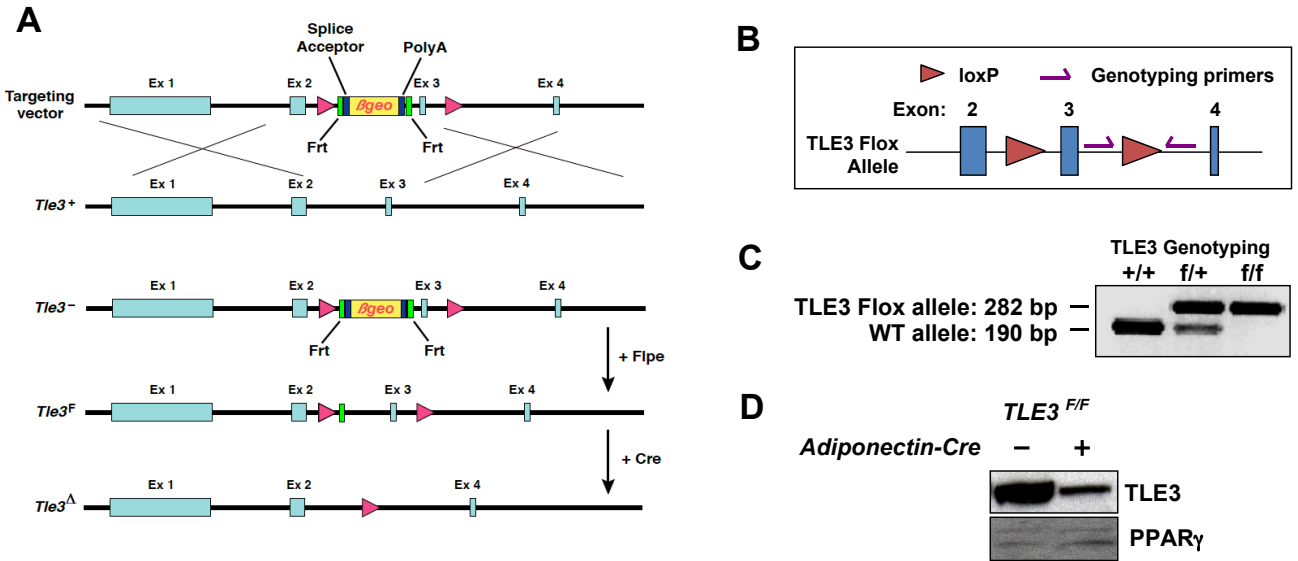

**Figure S3. Strategy for the Generation of Adipose-Specific TLE3 Knockout Mice, Related to Figure 4**

A. Schematic of the *Tle3* targeting vector containing a  $\beta$ geo gene-trapping cassette (flanked by Frt sites; green) in intron 2 and a pair of loxP sites (red triangles) flanking exon 3. After recombination with the targeting vector, the targeted allele ( $Tle3^-$ ) will produce a fusion transcript consisting of exons 1 and 2 of *Tle3* and  $\beta$ geo. Removal of the  $\beta$ geo gene-trapping cassette with *Flp* recombinase creates a floxed allele ( $Tle3^F$ ). *Cre* recombinase removes exon 3 from  $Tle3^F$ , generating a frameshift and creating a delta allele ( $Tle3^\Delta$ ). Open squares represent exons. LoxP and Frt sites are depicted as red triangles and green squares, respectively. B. Schematic illustration of pCR genotyping strategy. C. PCR analysis of WT and Ad-TLE3 KO mice. D. TLE3 protein expression in epididymal adipose tissue from WT and Ad-TLE3 KO mice.

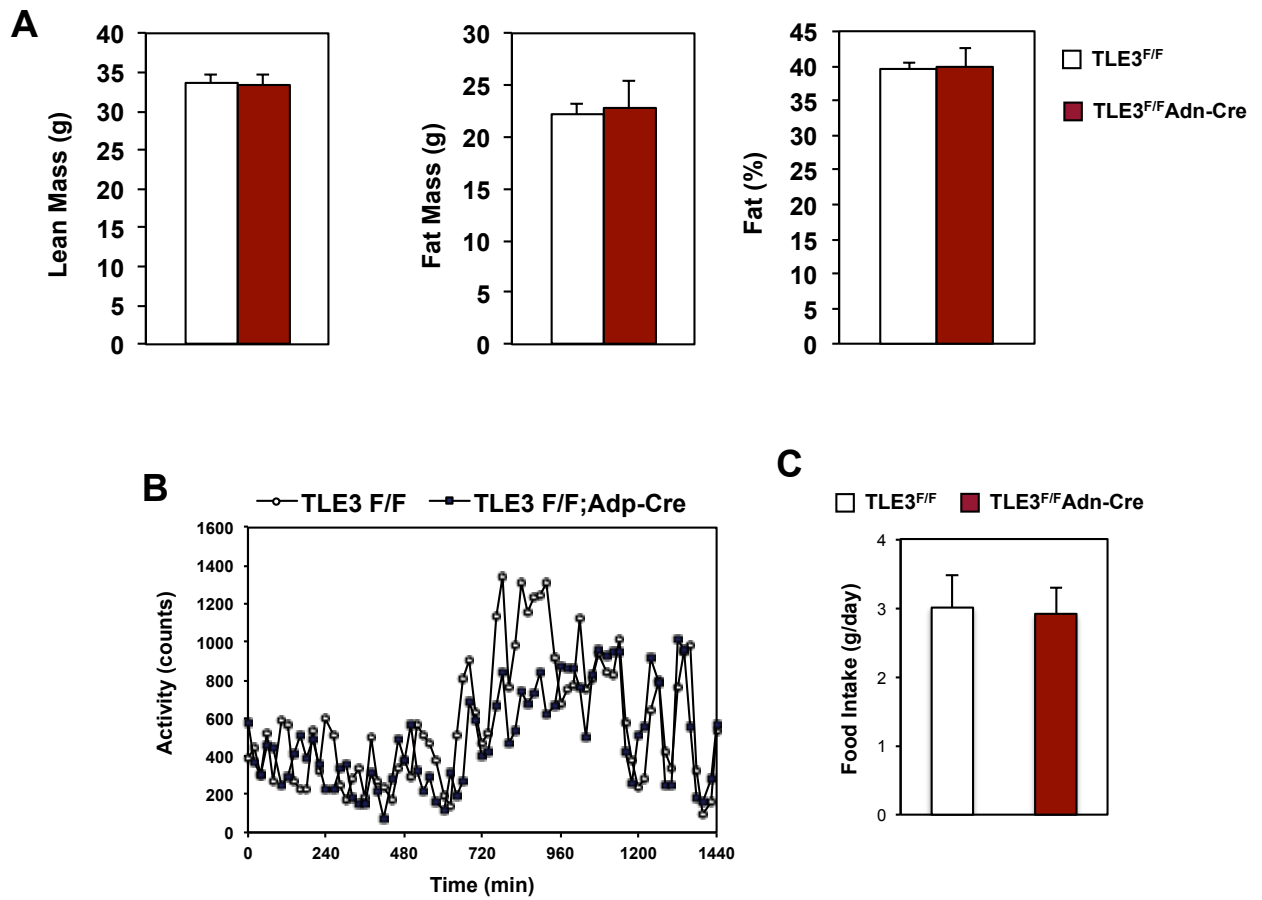

**Figure S4. Related to Figure 4**

Physical activity (A) and food intake (B) in Cre-negative and Cre-positive TLE3<sup>F/F</sup> mice (N=6-10/group) determined by housing in Oxymax metabolic cages.

**Table S1. Murine qPCR Primers**

aP2 F caccgcagacgacaggaag  
aP2 R gcacctgcaccagggc  
CD36 F ttgaaaagtctcggacattgag  
CD36 R tcagatccgaacacagcgta  
Plin F ccatctctacccgccttcg  
Plin R cttgtcagagtgcttgaatg  
Lyz2 F gaatggaatggctggctact  
Lyz2 R cgtgctgagctaaacacacc  
Serpina3k F agccaacaacctgaacatc  
Serpina3k R tcccatagctacaatgaagg  
Ephx1 F tcctcaattcctggctatg  
Ephx1 R ggccaccgaatttaacctt  
Pltp F gtctaaaatgaatatggccttcg  
Pltp R ccagaagtgaacgtgga  
Otop1 F actaggaccccgctgaatct  
Otop1 R accatgctctacgtgctgtg  
Cldn1 F cttgacccccatcaatgc  
Cldn1 R cacctcccagaaggcaga  
Dhrs9 F atttggtggagggggcta  
Dhrs9 R tgcacacaaaagctttcat  
Elovl3 F tccgcttctcatgtagtct  
Elovl3 R ggacctgatgcaaccctatga  
Eva1 F gtccaaccagaccatcaac  
Eva1 R ctccatcttgctctggaagc  
Dio2 F cagtgtggtgcacgttccaatc  
Dio2 R tgaaccaaagttgaccaccag  
Fgf21 F agatggagctctctatggatcg  
Fgf21 R gggcttcagactggtacacat  
UCP1 F ggcctctacgactcagtcca  
UCP1 R taagccggctgagatcttgt  
Prdm16 F gccatgtgtcagatcaacga  
Prdm16 R ccttctttcacatgcaccaa  
Fbxo21 F cttgaacctctacatgcaccag  
Fbxo21 R aagtggcttgggaagttgac  
Itpk1 F cacatcagatcgtgagtcacatc  
Itpk1 R gaagactccggctttgacac  
Gmpr F ctcaaggggcacatcatctc  
Gmpr R aaaggctttggcgacatct  
Socs2 F ccccttaggtagtttagctgaatg  
Socs2 R tttaaaaggccatttgatctt  
36B4 F agatgcagcagatccgcat  
36B4 R gttcttgccatcagcacc

Murine CHIP Primers  
Plin F tcacctgccttaggatc PPRE  
Plin R tggctgcttctgtacggattc  
Adrp F ttaggtgaaagggcaaagaaag PPRE  
Adrp R gtccaccgcttgttactccc  
Dhrs9 F cctttgaaacctgtgacct PPRE  
Dhrs9 R tgcaacaccaagtgtgacta  
aP2 F gagagcaaatggagttcccaga PPRE  
aP2 R ttgggctgtgacactccac  
Chr. 15 F tggtagcctcaggagcttgc  
Chr. 15 R atccaagatgggaccaagctg
